# Supplementary material
Source: PubMed Central journal article supplement (PMC6812632)
Supplement: NIHMS1539407-supplement-Supplemental_Material.pdf [file NIHMS1539407-supplement-Supplemental_Material.pdf]

## SUPPLEMENTAL MATERIALS

### **The coronary artery disease risk-associated *Plpp3* gene and its product lipid phosphate phosphatase 3 regulate experimental atherosclerosis**

Paul A. Mueller<sup>1</sup>, Liping Yang<sup>1</sup>, Margo Ubele<sup>1</sup>, Guogen Mao<sup>1</sup>, Jason Brandon<sup>1</sup>, Julia Vandra<sup>1</sup>, Timothy C. Nichols<sup>2</sup>, Diana Escalante-Alcalde<sup>3</sup>, Andrew J. Morris<sup>1,4</sup>, and Susan S. Smyth\*<sup>1,4</sup>

<sup>1</sup> Division of Cardiovascular Medicine, The Gill Heart & Vascular Institute, University of Kentucky, Lexington, KY 40536.

<sup>2</sup>Department of Pathology and Laboratory Medicine, University of North Carolina at Chapel Hill, Chapel Hill, NC, 27516.

<sup>3</sup>División de Neurociencias, Instituto de Fisiología, Celular Universidad Nacional Autónoma de México, Ciudad de México, CDMX, México 04510

<sup>4</sup>Department of Veterans Affairs Medical Center, Lexington, KY 40511.

## Major Resources Tables

### Animals (in vivo studies)

| Species | Vendor or Source                                                                                          | Background Strain                                                                                                                                                                                       | Sex  |
|---------|-----------------------------------------------------------------------------------------------------------|---------------------------------------------------------------------------------------------------------------------------------------------------------------------------------------------------------|------|
| Mice    | The Jackson Laboratory                                                                                    | Ldlr-/-<br>B6.129S7-Ldlrtm1Her/J<br>Stock No: 002207                                                                                                                                                    | Both |
| Mice    | The Jackson Laboratory                                                                                    | MX1-Cre<br>B6.Cg-Tg(Mx1-<br>cre)1Cgn/J<br>Stock No: 003556                                                                                                                                              | Male |
| Mice    | The Jackson Laboratory                                                                                    | LysM-Cre<br>B6.129P2-<br>Lyz2tm1(cre)lfo/J<br>Stock No: 004781                                                                                                                                          | Male |
| Mice    | The Jackson Laboratory                                                                                    | B6.Cg-Tg(Tagln-<br>cre)1Her/J<br>Stock No: 017491                                                                                                                                                       | Male |
| Pig     | The Francis Owen<br>Blood Research<br>Laboratory at the<br>University of North<br>Carolina at Chapel Hill | Spotted Poland/China<br>and Yorkshire crosses;<br>Male and female pigs<br>from the following two<br>genotypes were used:<br>normocholesterolemic<br>or heterozygous<br>familial<br>hypercholesterolemic | Both |

### Animal breeding

|                        | Species | Vendor or Source                             | Background Strain | Other Information                                                                                                                           |
|------------------------|---------|----------------------------------------------|-------------------|---------------------------------------------------------------------------------------------------------------------------------------------|
| <b>Parent - Male</b>   | Mice    | The Jackson<br>Laboratory; Bar<br>Harbor, ME | Ldlr-/-           | Plpp3fl/fl animals<br>(fl/fl) with or without<br>the MX1-Cre or SMC-<br>22 Cre transgene<br>were crossed to Ldlr-<br>/- mice <sup>8</sup> . |
| <b>Parent - Female</b> | Mice    | The Jackson<br>Laboratory; Bar<br>Harbor, ME | Ldlr-/-           | Plpp3fl/fl animals<br>(fl/fl) with or without<br>the MX1-Cre or SMC-<br>22 Cre transgene<br>were crossed to Ldlr-<br>/- mice <sup>8</sup> . |
| <b>Parent - Male</b>   | Mice    | The Jackson<br>Laboratory; Bar<br>Harbor, ME | C57BL/6           | To simulate LDL<br>receptor deficiency,<br>mice lacking Lpar49                                                                              |

|                        |      |                                        |          |                                                                                                                                                                            |
|------------------------|------|----------------------------------------|----------|----------------------------------------------------------------------------------------------------------------------------------------------------------------------------|
|                        |      |                                        |          | were backcrossed to C57BL/6 background, and then bred to generate Lpar4Y/+ and Lpar4 Y/- mice <sup>9</sup> .                                                               |
| <b>Parent - Female</b> | Mice | The Jackson Laboratory; Bar Harbor, ME | C57BL/6J | To simulate LDL receptor deficiency, mice lacking Lpar49 were backcrossed to the C57BL/6J background, and then bred to generate Lpar4Y/+ and Lpar4 Y/- mice <sup>9</sup> . |

### Antibodies

| Target antigen            | Vendor or Source                                                                                                                                                                                                                                                                      | Catalog # | Working concentration | Lot # (preferred but not required) |
|---------------------------|---------------------------------------------------------------------------------------------------------------------------------------------------------------------------------------------------------------------------------------------------------------------------------------|-----------|-----------------------|------------------------------------|
| LPP3 (PPAP2B)             | A peptide corresponding to residues 2–17 (QNYKYDKA-IVPESKNG) of the sequence of human PAP2b was synthesized. Rabbits were immunized, and antibody titers were determined by enzyme-linked immunosorbent assay using the individual peptide antigen as the solid phase <sup>12</sup> . | n/a       | 1µg/mL                |                                    |
| Smooth muscle alpha-actin | Abcam                                                                                                                                                                                                                                                                                 | AB5694    | 2µg/mL                |                                    |
| CD68                      | Abcam                                                                                                                                                                                                                                                                                 | AB53444   | 10µg/mL               |                                    |
| PECAM1                    | BD Biosciences                                                                                                                                                                                                                                                                        | 553370    | 5µg/mL                |                                    |
| Podocalyxin               | R&D Syatems                                                                                                                                                                                                                                                                           | AF1556    | 2µg/mL                |                                    |

**Cultured Cells**

| <b>Name</b>                            | <b>Vendor or Source</b>                                              | <b>Sex (F, M, or unknown)</b> |
|----------------------------------------|----------------------------------------------------------------------|-------------------------------|
| Bone marrow-derived macrophages (BMDM) | Femur and tibia.                                                     | Both                          |
| SMC                                    | Aorta                                                                | Both                          |
| SMC-derived foam cells                 | Primary human coronary artery SMC (Clonetics™, Lonza, Allendale, NJ) | unknown                       |

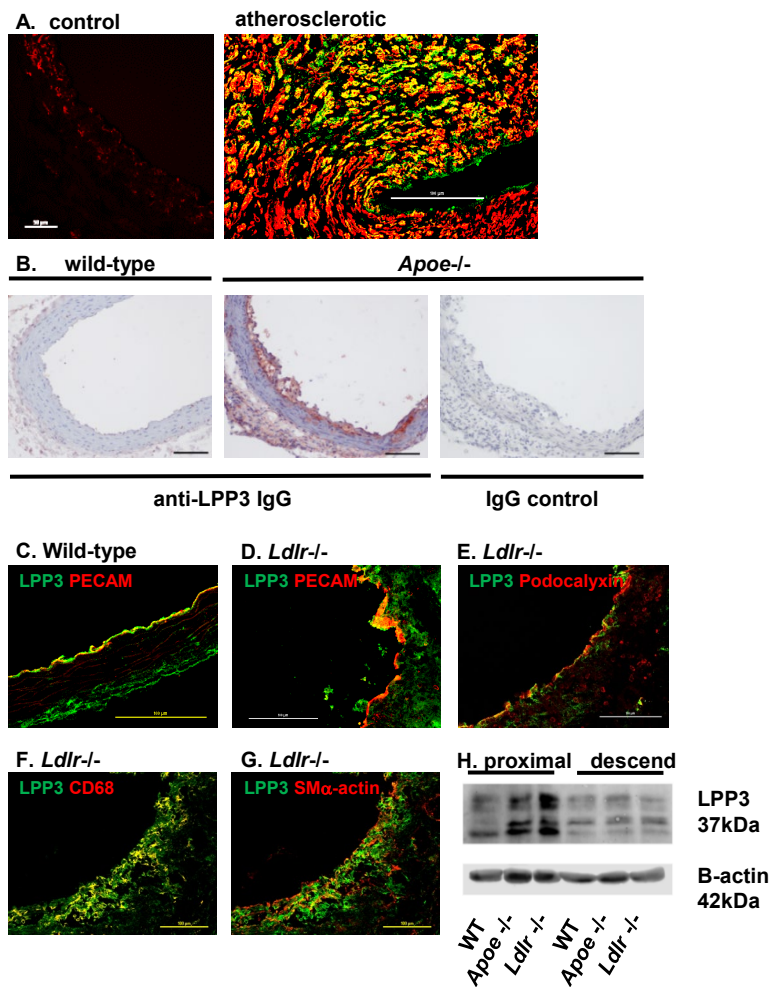

**Supplemental Figure 1. Upregulation of LPP3 expression during experimental atherosclerosis.** **A)** Immunofluorescence staining of LPP3 (green) and SMC  $\alpha$ -actin (red) in cross-sections of healthy (left) and atherosclerotic (right) porcine coronary arteries. Pigs are the result of crosses between Spotted Poland/China and Yorkshire animals. The heterozygous familial hypercholesterolemic pigs have a recessive inheritance pattern as the result of a mutation in the LDL receptor that results in an arginine<sub>94</sub> to cysteine<sub>94</sub> mutation, located in the region that corresponds to exon 4 in the human ligand binding domain. The FH pigs are normocholesterolemic at baseline and only exhibit hypercholesterolemia when fed a high fat diet. Scale bar = 100 $\mu$ m **B)** Immunohistochemical staining with anti-LPP3 IgG (left and middle) or control rabbit anti-IgG (right) of sections of aortic root from C57BL/6J wildtype mice and Apoe<sup>-/-</sup> mice that were fed Western diet for 12 weeks. Scale bar = 300 $\mu$ m **C)** Immunofluorescence staining of LPP3 (green) and PECAM (red) in cross-sections of aortic root from C57BL/6J mice and **C) Ldlr<sup>-/-</sup>** mice fed Western diet for 12 weeks. Co-localization of LPP3 expression (green) in atherosclerotic Ldlr<sup>-/-</sup> aortic root sections with **E)** podocalyxin (red), **F)** CD68 (red), and **G)** SMC  $\alpha$ -actin (red). Scale bar = 100 $\mu$ m. **H)** Immunoblot of LPP3 and  $\beta$ -actin tissue lysates from the proximal and descending aorta of WT, Apoe<sup>-/-</sup>, and Ldlr<sup>-/-</sup> mice fed Western diet for 12 weeks.

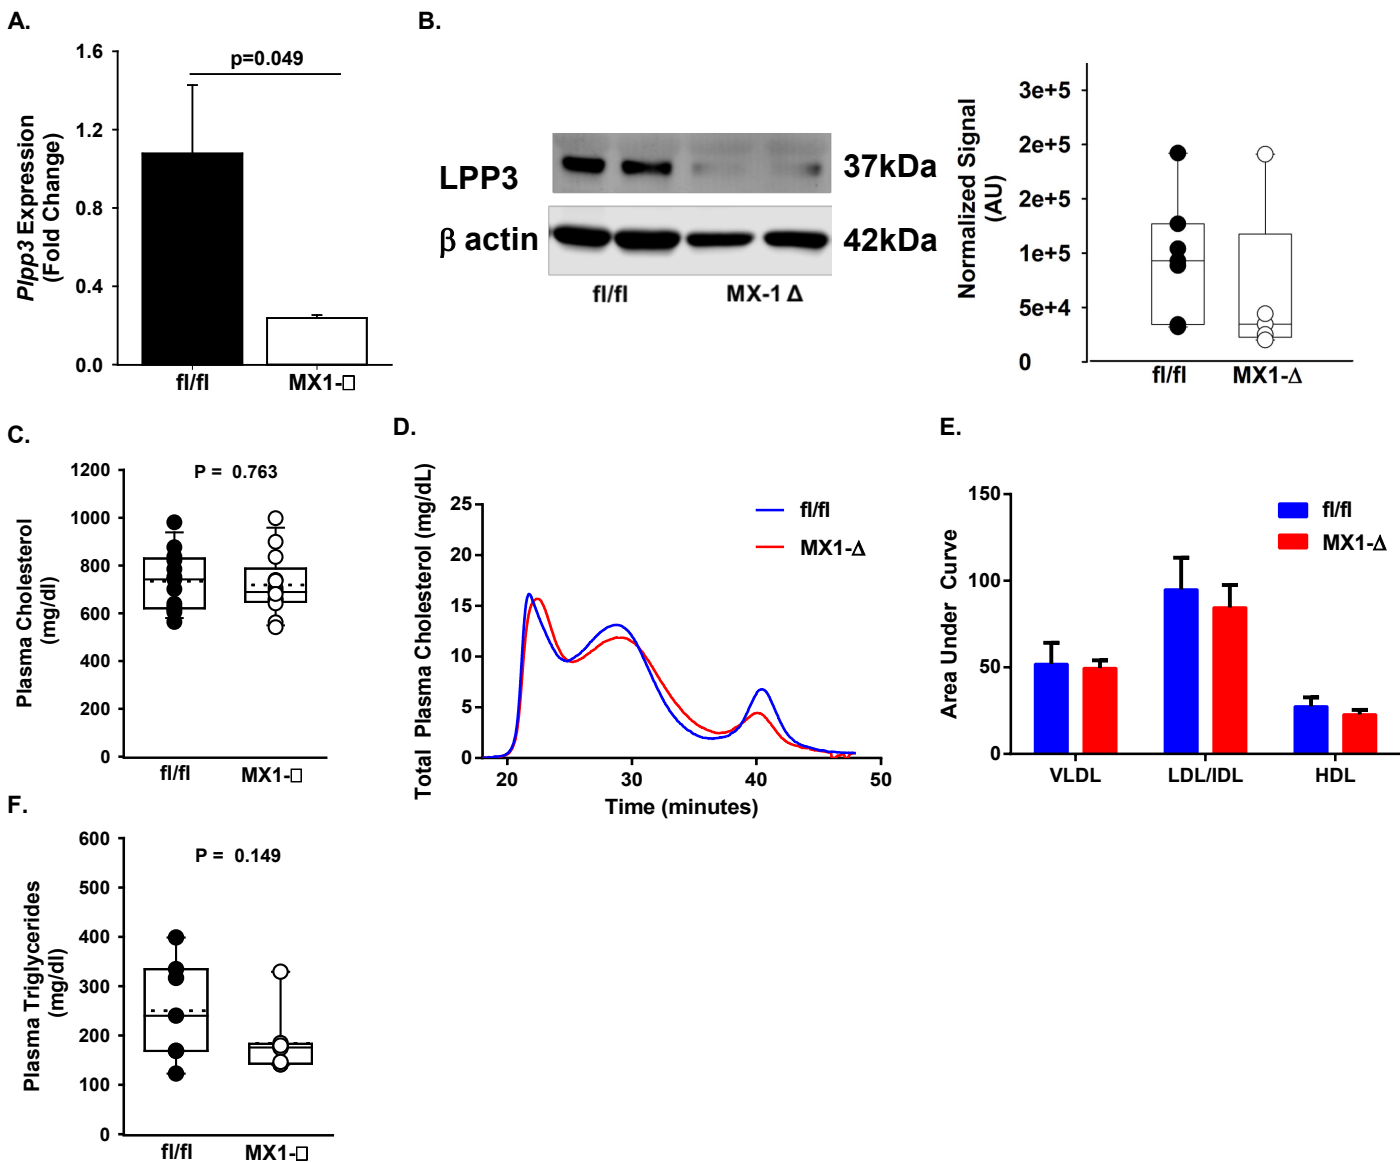

**Supplemental Figure 2. Plasma Characterization in mice with MX1-mediated global reductions of *Plpp3*.** **A)** *Plpp3* gene expression (fold change; mean  $\pm$  SD) determined by qRT-PCR analysis of RNA from bone marrow cells from *fl/fl* and *MX1-Δ* mice (n=3-5/group). **B)** Quantification of LPP3 expression normalized to  $\beta$ -actin in proximal aortas from *fl/fl* and *MX1-Δ* mice on the *Ldlr*<sup>-/-</sup> background after 12 weeks on Western diet (right panel; data displayed as arbitrary relative units; median and IQR), as determined by immunoblotting (left panel). **C)** Total plasma cholesterol (mg/dl; median and IQR) from *fl/fl* and *MX1-Δ* mice on the *Ldlr*<sup>-/-</sup> background 12 weeks after Western diet. **D)** Representative plasma cholesterol content of fast protein liquid chromatography (FPLC) fractionated lipoproteins. **E)** Area under the curve analysis of plasma cholesterol distribution determined by FPLC (N=4/genotype; mean  $\pm$  SD). **F)** Total plasma triglycerides (mg/dL; mean  $\pm$  SEM) (n=16/group).

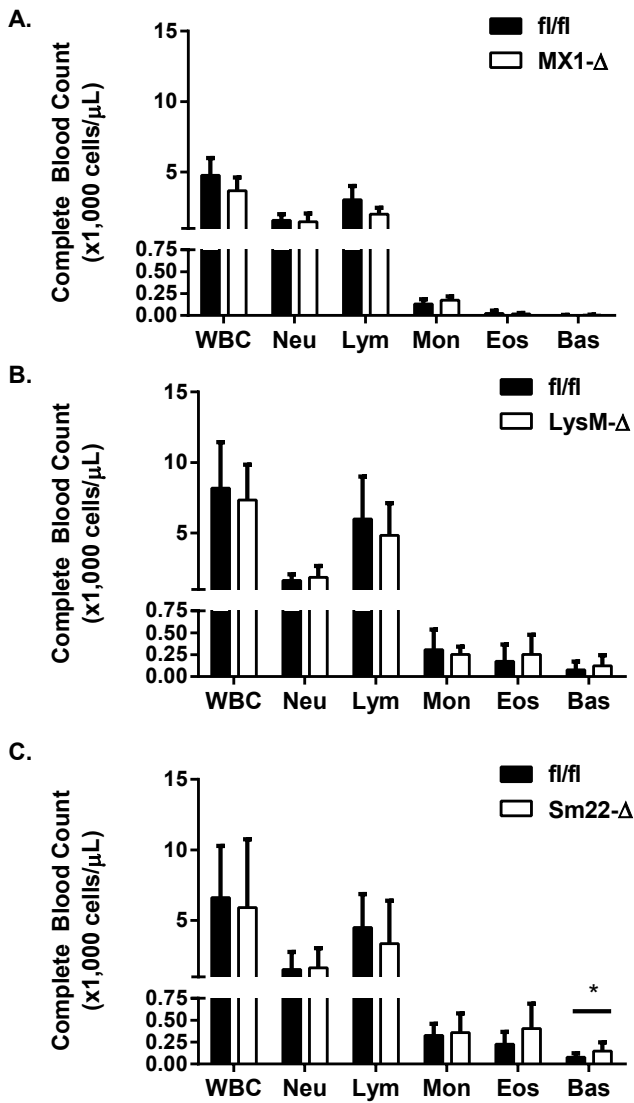

**Supplemental Figure 3. Complete Blood Counts.** Complete blood counts performed on whole blood from **A)** *fl/fl* and *MX1- $\Delta$* ; **B)** *fl/fl* and *LysM- $\Delta$* ; and **C)** *fl/fl* and *SM22- $\Delta$*  mice on the *Ldlr*<sup>-/-</sup> background fed Western diet for 12 weeks. \* $P < 0.05$
